# Supplementary material
Source: publisher site journal article supplement (http://www.spandidos-publications.com/1069/downloadSupplementary)

Figure S1. PCR analysis confirmed the successful knockdown of TIGAR using the si-TIGAR plasmid. \* $P < 0.05$  vs. blank group. TIGAR, TP53-inducible glycolysis and apoptosis regulator; si, small interfering; miR, microRNA.

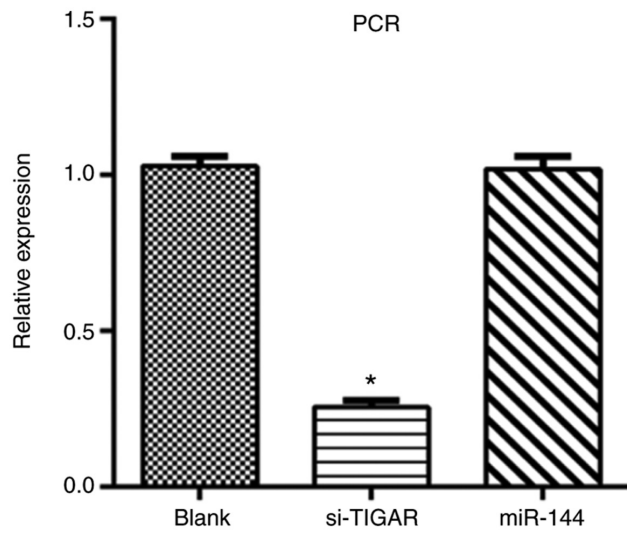

Supplement: Supplementary file 1 [file downloadSupplementary]
